# Supplementary material for: Inkjet-printed alloy-like cross-linked hole-transport layer for high-performance solution-processed green phosphorescent OLEDs
Source: Royal Society of Chemistry journal article supplement (doi:10.1039/d1tc02456f), 2021-01-01
Supplement: d1tc02456f1.pdf [file d1tc02456f1.pdf]

## Supporting Information

**Inkjet printed alloy-like cross-linked hole transport layer for high performance solution-processed green phosphorescent OLEDs**

**Yichen Pan <sup>ab</sup>, Hongli Liu <sup>\*ab</sup>, Shirong Wang <sup>ab</sup>, Xinjun Han <sup>ab</sup> and Xianggao Li <sup>\*ab</sup>**

a. School of Chemical Engineering and Technology, Tianjin University, Tianjin 300072, China.

b. Collaborative Innovation Center of Chemical Science and Engineering, Tianjin 300072, China.

E-mail: liuhongli@tju.edu.cn, lixianggao@tju.edu.cn

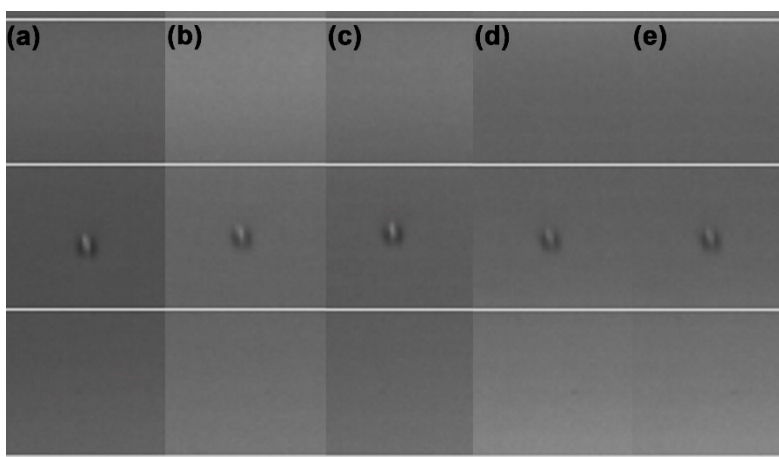

**Fig. S1** Jetting behaviour of different inks (a) CYC ink, (b) CYC:DGME=9:1, (c) CYC:DGME=8:2, (d) CYC:DGME=7:3 and (e) CYC:DGME=6:4.

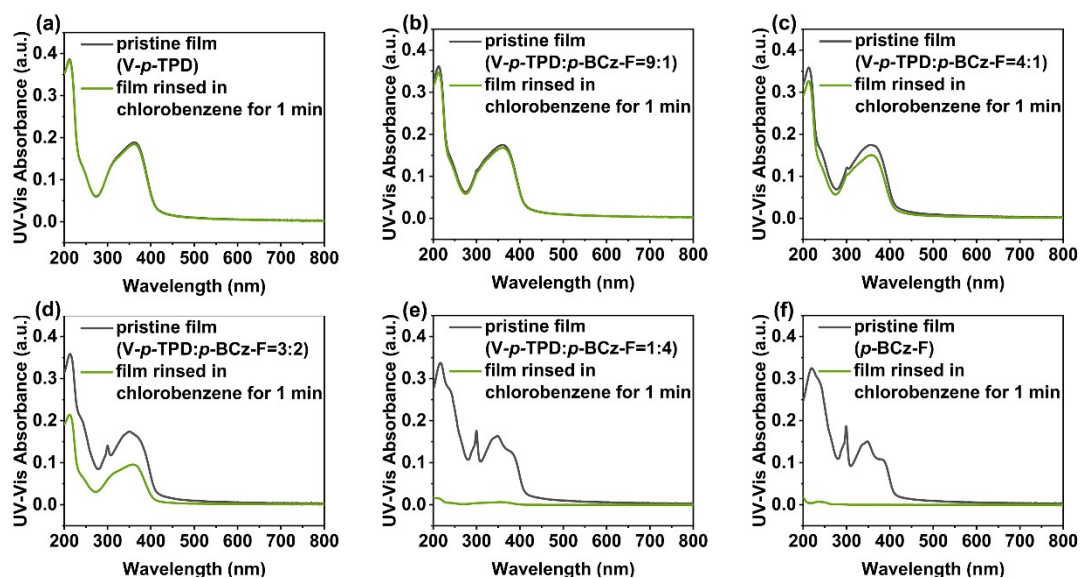

**Fig. S2** UV-Vis absorption spectra of films cross-linked at 150 °C before/after 1 min chlorobenzene rinsing with varied material ratio of V-*p*-TPD/ *p*-BCz-F.

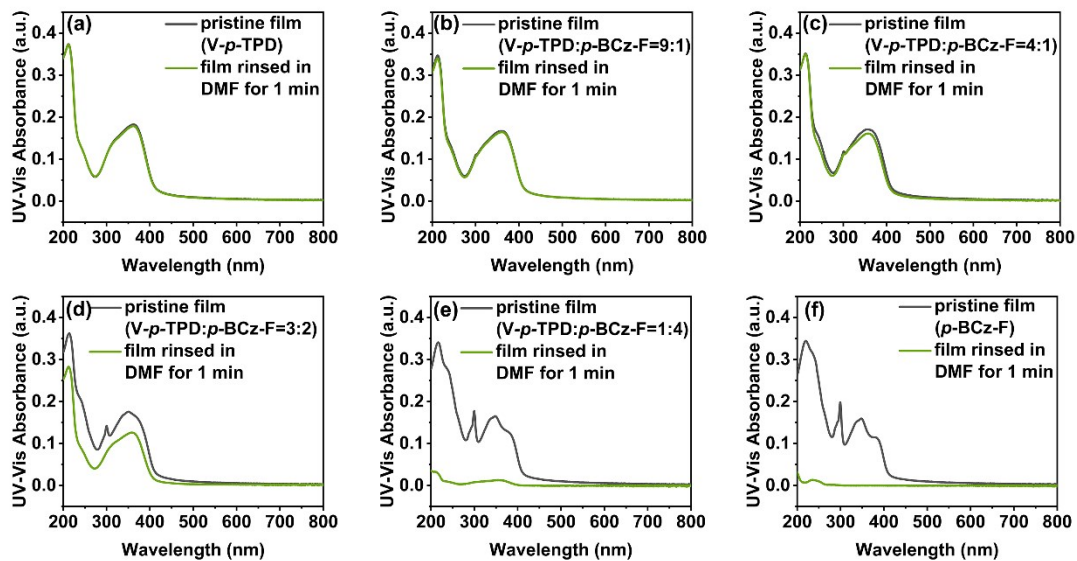

**Fig. S3** UV-Vis absorption spectra of films cross-linked at 150 °C before/after 1 min DMF rinsing with varied material ratio of V-*p*-TPD/ *p*-BCz-F.

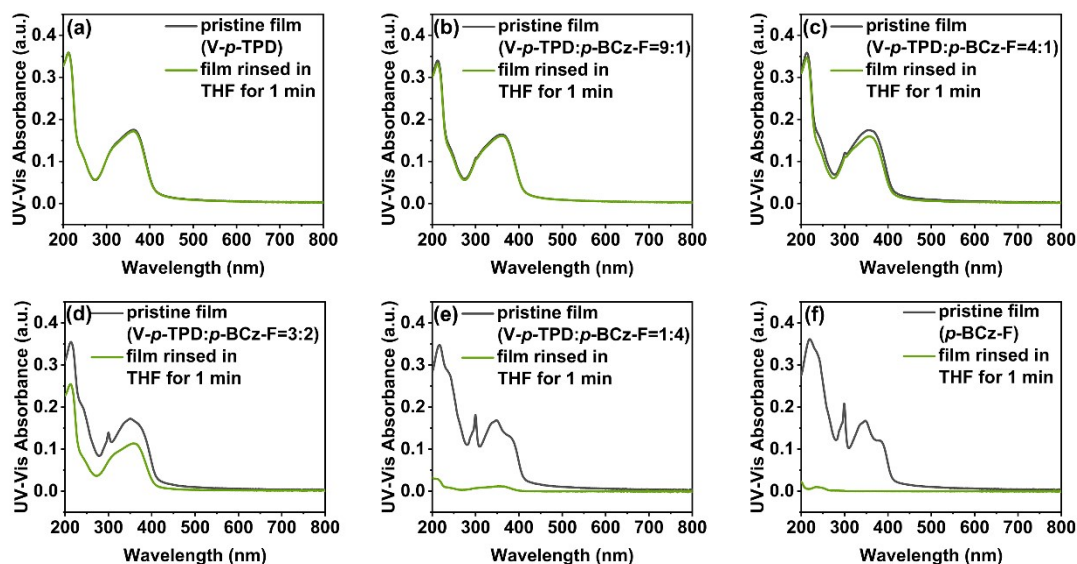

**Fig. S4** UV-Vis absorption spectra of films cross-linked at 150 °C before/after 1 min THF rinsing with varied material ratio of V-*p*-TPD/ *p*-BCz-F.

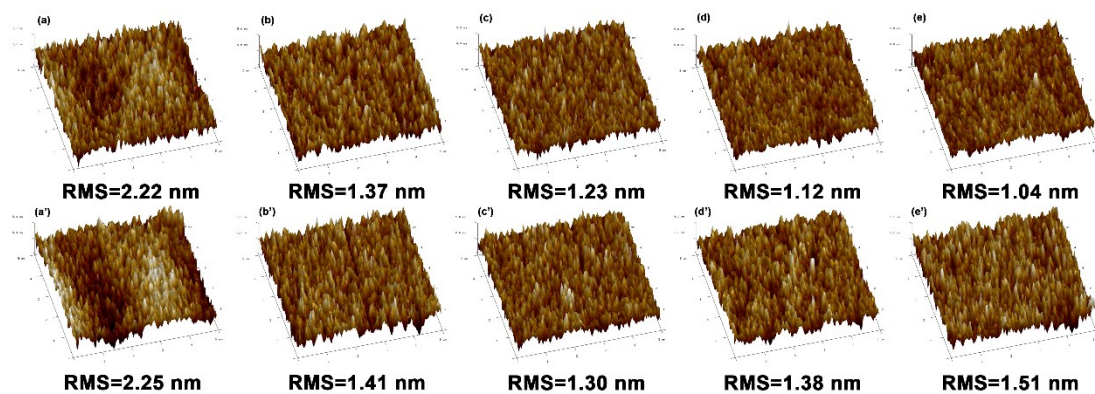

**Fig. S5** AFM characterizations of inkjet printed films of (a) *V-p*-TPD, (b) *V-p*-TPD:*p*-BCz-F=9:1, (c) *V-p*-TPD:*p*-BCz-F=8:2, (d) *V-p*-TPD:*p*-BCz-F=7:3, (e) *V-p*-TPD:*p*-BCz-F=6:4 before toluene rinsing, and (a') *V-p*-TPD, (b') *V-p*-TPD:*p*-BCz-F=9:1, (c') *V-p*-TPD:*p*-BCz-F=8:2, (d') *V-p*-TPD:*p*-BCz-F=7:3, (e') *V-p*-TPD:*p*-BCz-F=6:4 after toluene rinsing.

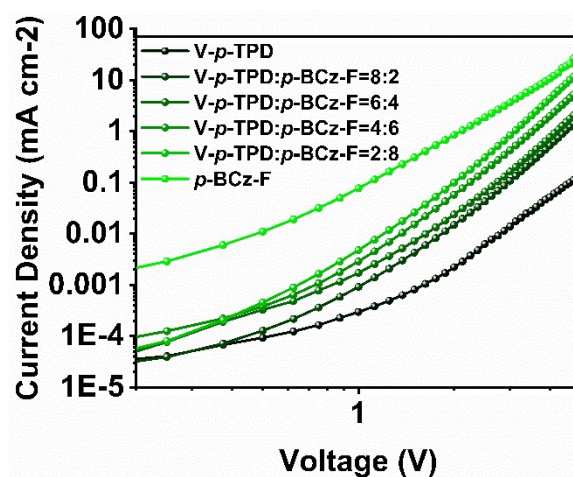

**Fig. S6** *J-V* characteristics for HODs.

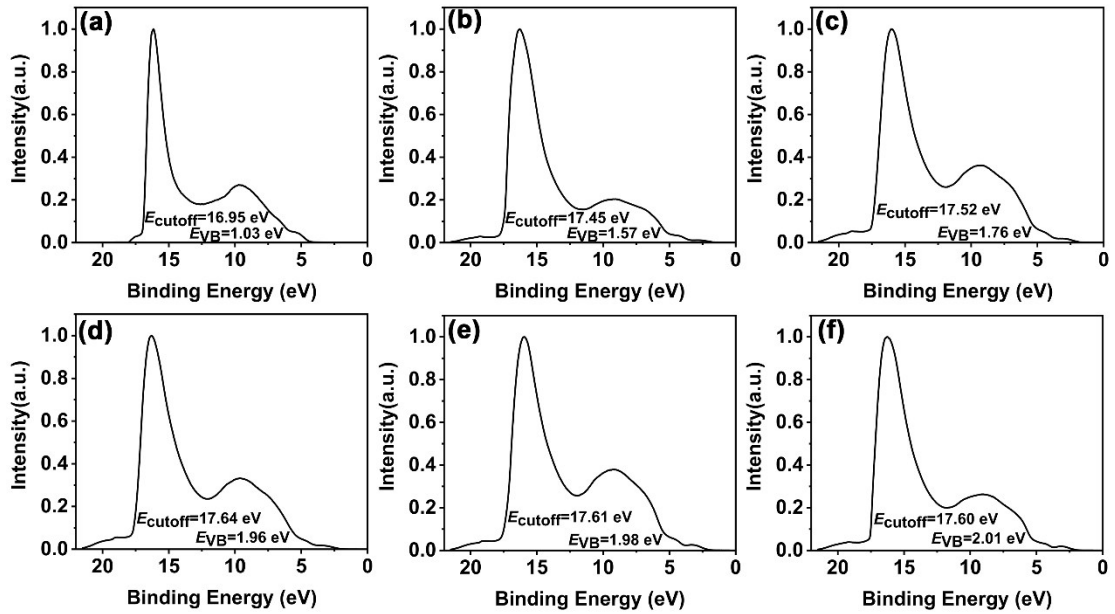

**Fig. S7** UPS spectra of (a) *V-p*-TPD, (b) *V-p*-TPD:*p*-BCz-F=8:2, (c) *V-p*-TPD:*p*-BCz-F=6:4, (d) *V-p*-TPD:*p*-BCz-F=4:6, (e) *V-p*-TPD:*p*-BCz-F=2:8, (f) *p*-BCz-F.

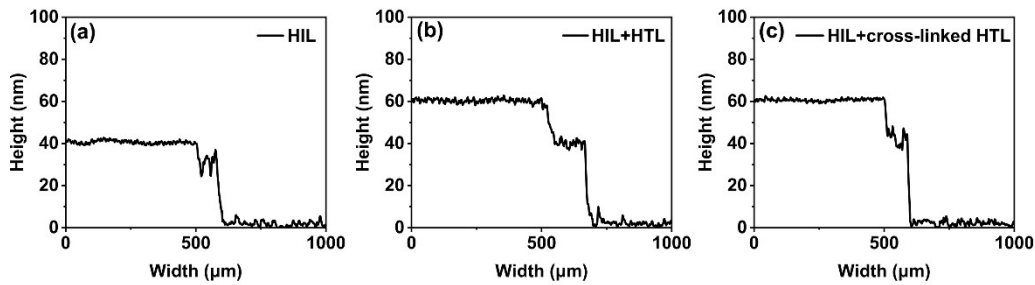

**Fig. S8** Thickness measurement of HTL before and after cross-linking.

Table. S1 Summary of previously reported the inkjet-printed OLEDs and QLEDs performances.

| Year | $L_{\max}$<br>( $\text{cd m}^{-2}$ ) | $CE_{\max}$<br>( $\text{cd A}^{-1}$ ) | $EQE_{\max}$<br>(%) | $V_{\text{on}}$<br>(V) | DOI                           |
|------|--------------------------------------|---------------------------------------|---------------------|------------------------|-------------------------------|
| 2021 | 119796                               | 55.47                                 | 15.44               | 3.18                   | This work                     |
| 2021 | -                                    | 25                                    | -                   | -                      | 10.1080/15980316.2020.1866090 |
| 2020 | 5778                                 | 9.8                                   | 3.0                 | 3.5                    | 10.1088/1361-6463/ab86e1      |
| 2020 | -                                    | 28                                    | 9.45                | -                      | 10.1016/j.orgel.2020.105822   |
| 2020 | 3743                                 | -                                     | 5.03                | 3.6                    | 10.1016/j.optmat.2020.109755  |
| 2020 | 15320                                | 17.5                                  | 6.3                 | -                      | 10.1088/2058-8585/ab670c      |
| 2020 | 4351                                 | 17.89                                 | -                   | 3.3                    | 10.1039/d0tc00628a            |
| 2019 | ~10000                               | 3.6                                   | -                   | 2.6                    | 10.1088/2058-8585/ab17a5      |
| 2019 | -                                    | 29.0                                  | 9.0                 | 3.5                    | 10.1021/acsami.9b04675        |
| 2019 | 6900                                 | 18                                    | -                   | 4                      | 10.1016/j.orgel.2019.07.011.  |
| 2019 | 2314                                 | 23.0                                  | 6.7                 | 4.0                    | 10.1038/s41598-019-43359-4    |
| 2019 | -                                    | 18.2                                  | 11.4                | 3.2                    | 10.1002/sml.201900111         |
| 2019 | 13240                                | 5.27                                  | -                   | 3.3                    | 10.1142/S0217984919501495     |

---

|      |        |      |      |      |                             |
|------|--------|------|------|------|-----------------------------|
| 2019 | 9669   | 15   | -    | 3.33 | 10.1021/acsami.9b07238      |
| 2017 | -      | 24   | -    | -    | 10.1016/j.orgel.2017.06.017 |
| 2017 | -      | 0.64 | -    | 5.6  | 10.1007/s11182-018-1352-3   |
| 2017 | 8850   | 1.12 | -    | 3.8  | 10.1039/c7tc01632h          |
| 2017 | >10000 | 3.5  | -    | -    | 10.1039/c7tc04084a          |
| 2016 | -      | 45   | 13.9 | -    | 10.1007/s00339-016-9726-2   |
| 2016 | 3000   | 15.2 | 4.7  | 3.7  | 10.1002/chem.201603847      |
| 2015 | 17000  | 8.7  | 4.6  | 4.5  | 10.1039/c5nr03034j          |
| 2015 | -      | 20.4 | -    | 3.5  | 10.1117/12.2186995          |
| 2012 | -      | 40   | 11.7 | -    | 10.1016/j.tsf.2012.07.084   |

---
